# Supplementary material
Source: publisher figshare collection journal article supplement (https://acs.figshare.com/ndownloader/files/26473896)
Supplement: Supplementary file [file 26473896]

# Supplemental Information: Random Structure Searching with Orbital-free Density Functional Theory

William C. Witt,<sup>\*,†</sup> Benjamin W. B. Shires,<sup>†</sup> Chuin Wei Tan,<sup>‡</sup> Wojciech J.  
Jankowski,<sup>¶</sup> and Chris J. Pickard<sup>\*,†,§</sup>

<sup>†</sup>*Department of Materials Science and Metallurgy, University of Cambridge, Cambridge,  
United Kingdom*

<sup>‡</sup>*Downing College, University of Cambridge, Cambridge, United Kingdom*

<sup>¶</sup>*Trinity College, University of Cambridge, Cambridge, United Kingdom*

<sup>§</sup>*Advanced Institute for Materials Research, Tohoku University, Sendai, Japan*

E-mail: wcw28@cam.ac.uk; cjp20@cam.ac.uk

# Preliminary Benchmarking: Equilibrium Volumes and Bulk Moduli

Tables S1 and S2 show the equilibrium volumes and bulk moduli corresponding to the relative energies in Table 1 of the main paper.

Table S1: Equilibrium volumes ( $\text{\AA}^3/\text{atom}$ ) for several elements and crystal structures as predicted by OFDFT using LPPs and eight variations of the same KE functional (Wang-Teter, Perrot, Smargiassi-Madden, and Wang-Govind-Carter, along with their exponential-stabilized forms) and as predicted by KSDFT using both LPPs (KS-L) and NLPPs (KS-NL). The italicized rows hold the optimized c/a ratios corresponding to the hcp structures.

| Li         |             |             |             |             |             |             |             |             |             |             |
|------------|-------------|-------------|-------------|-------------|-------------|-------------|-------------|-------------|-------------|-------------|
|            | WT          | WT-e        | P           | P-e         | SM          | SM-e        | WGC         | WGC-e       | KS-L        | KS-NL       |
| fcc        | 20.2        | 20.3        | 20.3        | 20.4        | 19.9        | 20.0        | 20.2        | 20.3        | 20.2        | 20.2        |
| hcp        | 20.3        | 20.3        | 20.4        | 20.4        | 19.9        | 20.0        | 20.2        | 20.3        | 20.2        | 20.3        |
| <i>c/a</i> | <i>1.63</i> | <i>1.63</i> | <i>1.63</i> | <i>1.63</i> | <i>1.63</i> | <i>1.63</i> | <i>1.63</i> | <i>1.63</i> | <i>1.63</i> | <i>1.63</i> |
| bcc        | 20.2        | 20.2        | 20.3        | 20.3        | 19.9        | 19.9        | 20.2        | 20.2        | 20.2        | 20.3        |
| sc         | 21.9        | 22.0        | 22.0        | 22.1        | 21.6        | 21.6        | 21.9        | 21.9        | 21.9        | 20.4        |
| cd         | 30.3        | 29.8        | 30.2        | 29.8        | 30.8        | 30.1        | 30.4        | 29.8        | 30.5        | 25.6        |
| Na         |             |             |             |             |             |             |             |             |             |             |
|            | WT          | WT-e        | P           | P-e         | SM          | SM-e        | WGC         | WGC-e       | KS-L        | KS-NL       |
| fcc        | 37.1        | 37.1        | 37.2        | 37.3        | 36.7        | 36.8        | 37.1        | 37.1        | 37.1        | 37.1        |
| hcp        | 37.1        | 37.2        | 37.3        | 37.3        | 36.8        | 36.8        | 37.1        | 37.1        | 37.1        | 37.2        |
| <i>c/a</i> | <i>1.63</i> | <i>1.63</i> | <i>1.63</i> | <i>1.63</i> | <i>1.63</i> | <i>1.63</i> | <i>1.63</i> | <i>1.63</i> | <i>1.63</i> | <i>1.63</i> |
| bcc        | 37.0        | 37.1        | 37.2        | 37.2        | 36.7        | 36.7        | 37.0        | 37.1        | 37.0        | 37.1        |
| sc         | 39.7        | 39.7        | 39.8        | 39.8        | 39.4        | 39.4        | 39.7        | 39.7        | 39.6        | 39.8        |
| cd         | 53.0        | 51.7        | 52.8        | 51.7        | 54.4        | 52.3        | 53.2        | 51.9        | 53.4        | 54.8        |
| Mg         |             |             |             |             |             |             |             |             |             |             |
|            | WT          | WT-e        | P           | P-e         | SM          | SM-e        | WGC         | WGC-e       | KS-L        | KS-NL       |
| hcp        | 23.1        | 23.2        | 23.4        | 23.5        | 21.5        | 21.9        | 23.0        | 23.1        | 22.9        | 22.9        |
| <i>c/a</i> | <i>1.63</i> | <i>1.63</i> | <i>1.63</i> | <i>1.63</i> | <i>1.63</i> | <i>1.63</i> | <i>1.63</i> | <i>1.63</i> | <i>1.63</i> | <i>1.62</i> |
| fcc        | 23.2        | 23.3        | 23.6        | 23.6        | 21.8        | 22.1        | 23.2        | 23.3        | 23.1        | 23.1        |
| bcc        | 23.0        | 23.1        | 23.4        | 23.4        | 21.4        | 21.8        | 22.9        | 23.0        | 22.8        | 22.9        |
| sc         | 27.2        | 27.1        | 27.4        | 27.3        | 26.5        | 26.5        | 27.2        | 27.1        | 27.1        | 27.5        |
| cd         | 39.5        | 37.8        | 40.1        | 38.0        | 41.8        | 38.2        | 40.0        | 38.0        | 39.9        | 40.3        |
| Al         |             |             |             |             |             |             |             |             |             |             |
|            | WT          | WT-e        | P           | P-e         | SM          | SM-e        | WGC         | WGC-e       | KS-L        | KS-NL       |
| fcc        | 16.8        | 16.8        | 17.0        | 17.0        | 15.7        | 15.8        | 16.7        | 16.8        | 16.6        | 16.5        |
| hcp        | 16.9        | 16.9        | 17.1        | 17.1        | 15.8        | 15.9        | 16.8        | 16.9        | 16.7        | 16.6        |
| <i>c/a</i> | <i>1.66</i> | <i>1.66</i> | <i>1.66</i> | <i>1.66</i> | <i>1.66</i> | <i>1.66</i> | <i>1.66</i> | <i>1.67</i> | <i>1.64</i> | <i>1.66</i> |
| bcc        | 17.2        | 17.2        | 17.4        | 17.4        | 16.0        | 16.2        | 17.1        | 17.1        | 17.0        | 16.9        |
| sc         | 19.9        | 19.7        | 20.1        | 19.9        | 19.6        | 19.3        | 19.9        | 19.7        | 19.9        | 20.1        |
| cd         | 28.8        | 27.2        | -           | 27.8        | 28.8        | 26.9        | 29.3        | 27.4        | 27.3        | 27.6        |

**Table S2: Bulk moduli (GPa) for several elements and crystal structures as predicted by OFDFT using LPPs and eight variations of the same KE functional (Wang-Teter, Perrot, Smargiassi-Madden, and Wang-Govind-Carter, along with their exponential-stabilized forms) and as predicted by KSDFT using both LPPs (KS-L) and NLPPs (KS-NL)**

| <b>Li</b> |    |      |    |     |    |      |     |       |      |       |
|-----------|----|------|----|-----|----|------|-----|-------|------|-------|
|           | WT | WT-e | P  | P-e | SM | SM-e | WGC | WGC-e | KS-L | KS-NL |
| fcc       | 16 | 16   | 16 | 16  | 16 | 16   | 16  | 16    | 16   | 14    |
| hcp       | 16 | 16   | 16 | 16  | 16 | 16   | 16  | 16    | 16   | 17    |
| bcc       | 16 | 16   | 16 | 16  | 16 | 16   | 16  | 16    | 16   | 14    |
| sc        | 12 | 12   | 12 | 12  | 13 | 13   | 12  | 12    | 12   | 12    |
| cd        | 6  | 7    | 6  | 7   | 5  | 6    | 6   | 7     | 6    | 5     |

  

| <b>Na</b> |     |      |     |     |     |      |     |       |      |       |
|-----------|-----|------|-----|-----|-----|------|-----|-------|------|-------|
|           | WT  | WT-e | P   | P-e | SM  | SM-e | WGC | WGC-e | KS-L | KS-NL |
| fcc       | 7.2 | 7.2  | 7.2 | 7.2 | 7.2 | 7.3  | 7.2 | 7.2   | 7.2  | 7.7   |
| hcp       | 7.2 | 7.2  | 7.2 | 7.2 | 7.3 | 7.3  | 7.2 | 7.2   | 7.2  | 7.7   |
| bcc       | 7.2 | 7.2  | 7.2 | 7.2 | 7.3 | 7.3  | 7.2 | 7.2   | 7.3  | 7.8   |
| sc        | 5.9 | 5.9  | 5.9 | 5.9 | 5.8 | 5.8  | 5.8 | 5.9   | 5.8  | 6.2   |
| cd        | 2.9 | 3.3  | 2.9 | 3.3 | 2.5 | 3.1  | 2.8 | 3.2   | 2.9  | 3.0   |

  

| <b>Mg</b> |    |      |    |     |    |      |     |       |      |       |
|-----------|----|------|----|-----|----|------|-----|-------|------|-------|
|           | WT | WT-e | P  | P-e | SM | SM-e | WGC | WGC-e | KS-L | KS-NL |
| hcp       | 37 | 37   | 37 | 37  | 39 | 40   | 37  | 38    | 39   | 36    |
| fcc       | 37 | 37   | 36 | 37  | 38 | 39   | 37  | 37    | 38   | 35    |
| bcc       | 37 | 37   | 36 | 36  | 39 | 40   | 37  | 37    | 38   | 35    |
| sc        | 24 | 24   | 24 | 25  | 22 | 23   | 24  | 24    | 24   | 23    |
| cd        | 11 | 14   | 11 | 14  | 9  | 13   | 11  | 14    | 10   | 11    |

  

| <b>Al</b> |    |      |    |     |    |      |     |       |      |       |
|-----------|----|------|----|-----|----|------|-----|-------|------|-------|
|           | WT | WT-e | P  | P-e | SM | SM-e | WGC | WGC-e | KS-L | KS-NL |
| fcc       | 79 | 80   | 77 | 78  | 82 | 85   | 79  | 80    | 77   | 79    |
| hcp       | 77 | 78   | 75 | 76  | 80 | 83   | 77  | 78    | 75   | 75    |
| bcc       | 71 | 73   | 69 | 71  | 75 | 77   | 71  | 73    | 71   | 70    |
| sc        | 57 | 62   | 56 | 61  | 53 | 61   | 57  | 61    | 58   | 56    |
| cd        | 23 | 35   | -  | 30  | 28 | 38   | 20  | 34    | 39   | 38    |

## The SHEAP Maps: Additional Information

As described in the main paper, the SHEAP maps are based on SOAP descriptors for the structures. We employed SOAP parameters of  $r_{\text{cut}} = 5$ ,  $n_{\text{max}} = 15$ ,  $l_{\text{max}} = 9$ , and  $\sigma = 0.5$ . We classified two structures as identical if the norm of their SOAP difference vector fell below a threshold of 0.7/0.25/0.2/0.07 for Li/Na/Mg/Al, respectively. For the SHEAP algorithm itself, we used a perplexity of 30 and a minimum hard sphere radius of 0.01 when creating the images. (For the three-dimensional SHEAP visualizations discussed next, we used the same parameters aside from a minimum hard sphere radius of 0.015.)

Dimensionality reduction for data visualization is not restricted to two map dimensions. To complement the two-dimensional SHEAP maps (Figs. 2-5 in the main paper), we generated corresponding three-dimensional SHEAP maps, which are summarized in Fig. S1. These results show that two map dimensions are sufficient for capturing the salient features in the data. In fact, the three-dimensional SHEAP maps are nearly flat, with little along the third dimension aside from the depth of the spheres. Our general experience with SHEAP suggests that, often, a third dimension becomes beneficial only with larger data sets.

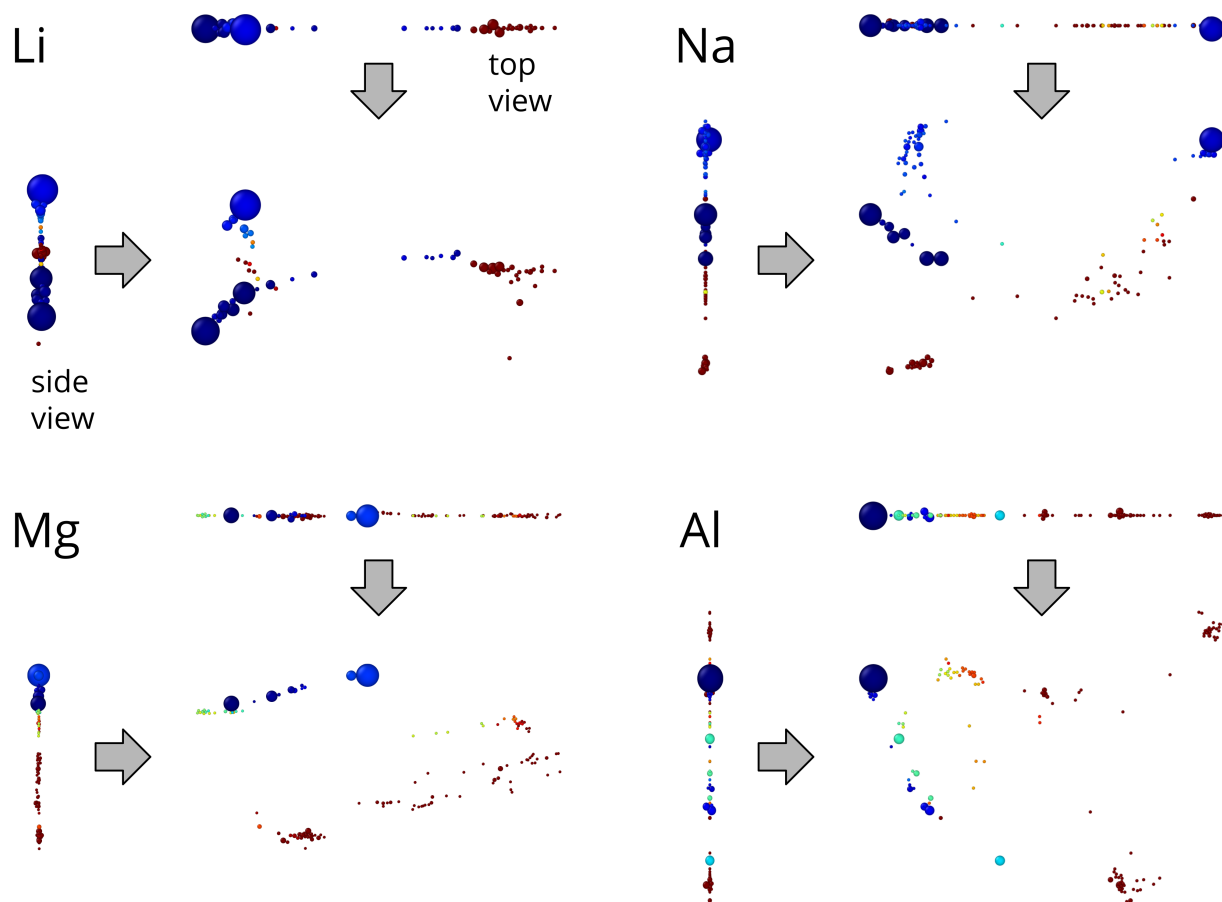

Figure S1: Three-dimensional SHEAP maps corresponding to the two-dimensional SHEAP maps found in Figs. 2-5 of the main paper. The maps are mostly flat, as seen from the side and top views, indicating that two dimensions are sufficient for representing the main features.

# Assessing the Exchange-Correlation Functional

To build confidence that the PBE exchange-correlation functional is suitable for the nearly-free-electron metals considered, we repeated some geometry optimizations with the LDA and PBEsol functionals. Beginning with the OFDFT-derived structures from the top portions of Figs. 2-5 in the main paper, we re-relaxed them using KS-DFT and both LDA and PBEsol. Exactly as with PBE, these relaxations were performed with CASTEP using C19 nonlocal pseudopotentials generated on-the-fly for the particular exchange-correlation functional.

The results are summarized in Figs. S2-S5. They show that the relative energies, even after geometry optimization, are insensitive to the choice of exchange-correlation functional. Frequently, the three lines representing the nonlocal pseudopotential calculations (for LDA, PBE, and PBEsol) are indistinguishable on the scale of the plots.

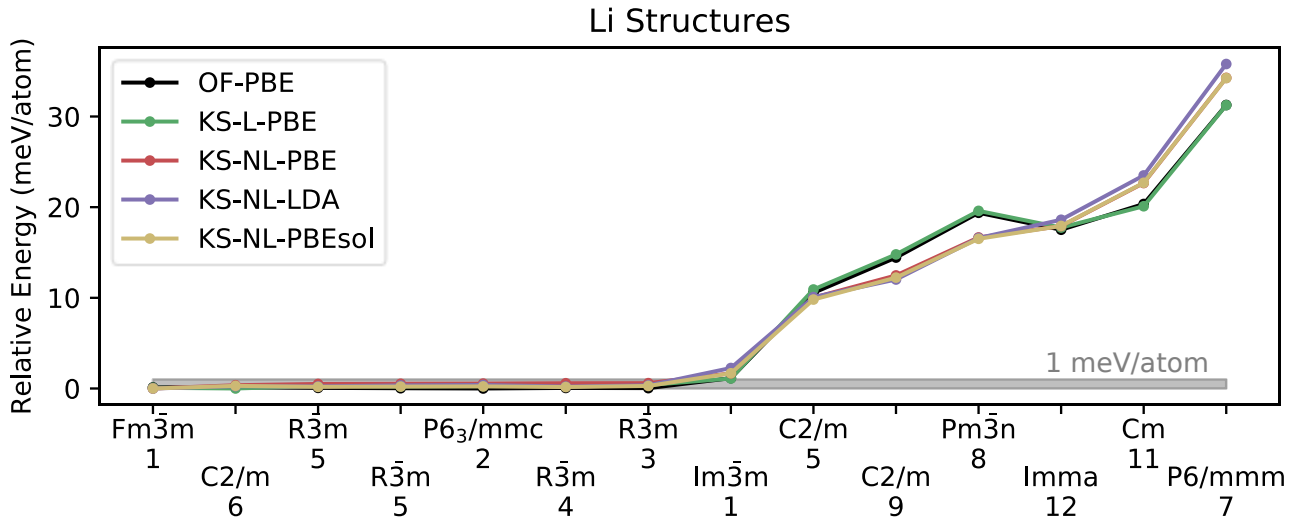

Figure S2: Relative energies of a subset of Li structures computed with OFDFT (OF) and KS-DFT with local or nonlocal pseudopotentials (KS-L and KS-NL, respectively). The labels also include the exchange-correlation functional used for the final geometry optimization (LDA, PBE, or PBEsol). Compare with Fig. 2 (*top*) in the main paper.

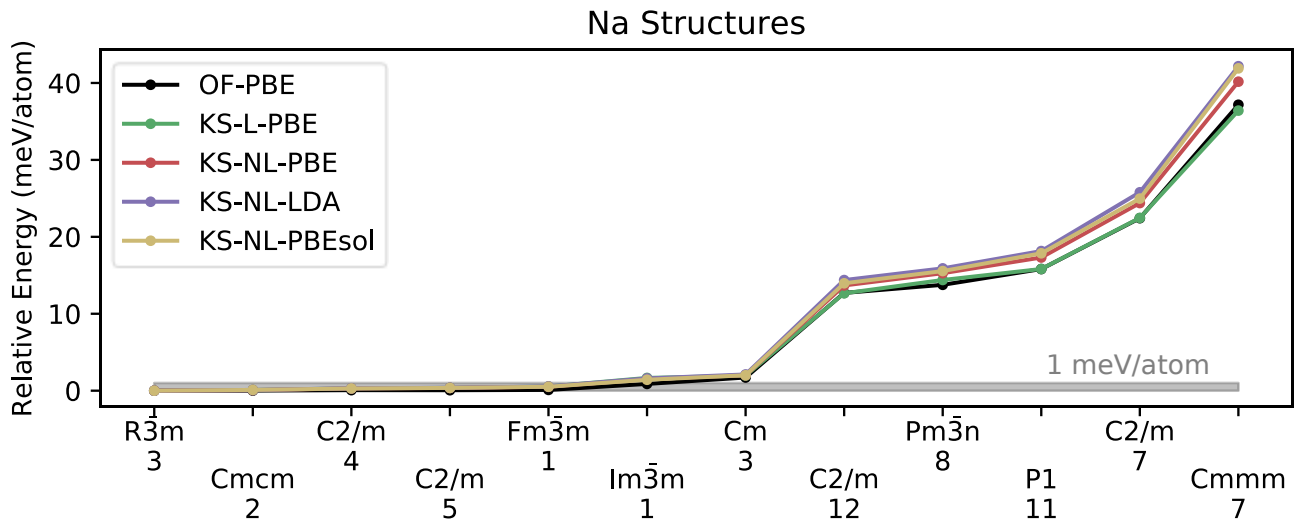

Figure S3: Relative energies of a subset of Na structures computed with OFDFT (OF) and KSDFT with local or nonlocal pseudopotentials (KS-L and KS-NL, respectively). The labels also include the exchange-correlation functional used for the final geometry optimization (LDA, PBE, or PBEsol). Compare with Fig. 3 (*top*) in the main paper.

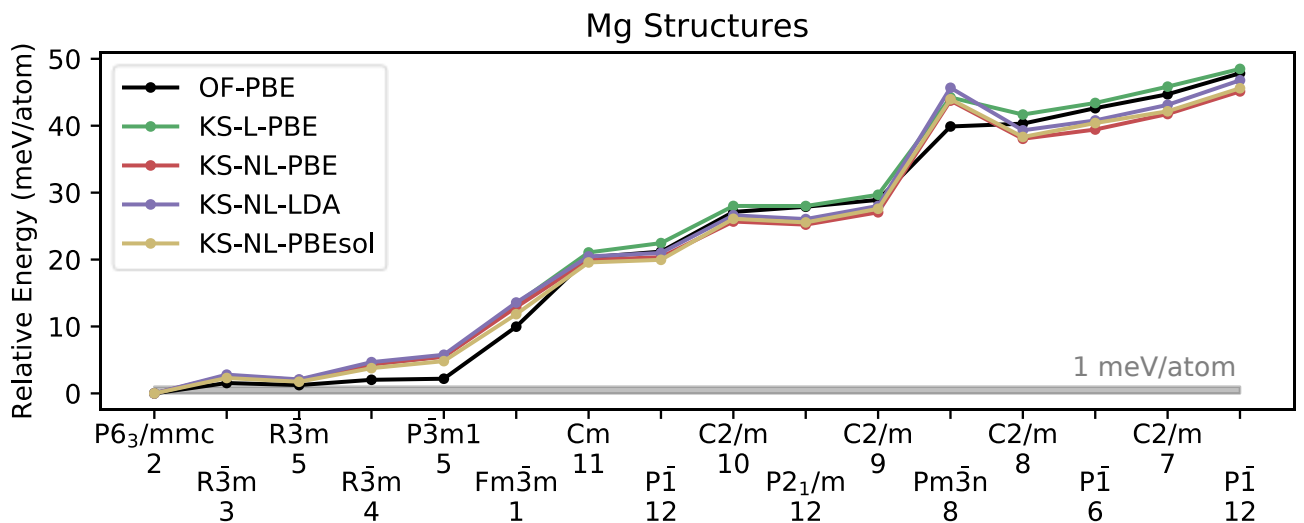

Figure S4: Relative energies of a subset of Mg structures computed with OFDFT (OF) and KSDFT with local or nonlocal pseudopotentials (KS-L and KS-NL, respectively). The labels also include the exchange-correlation functional used for the final geometry optimization (LDA, PBE, or PBEsol). Compare with Fig. 4 (*top*) in the main paper.

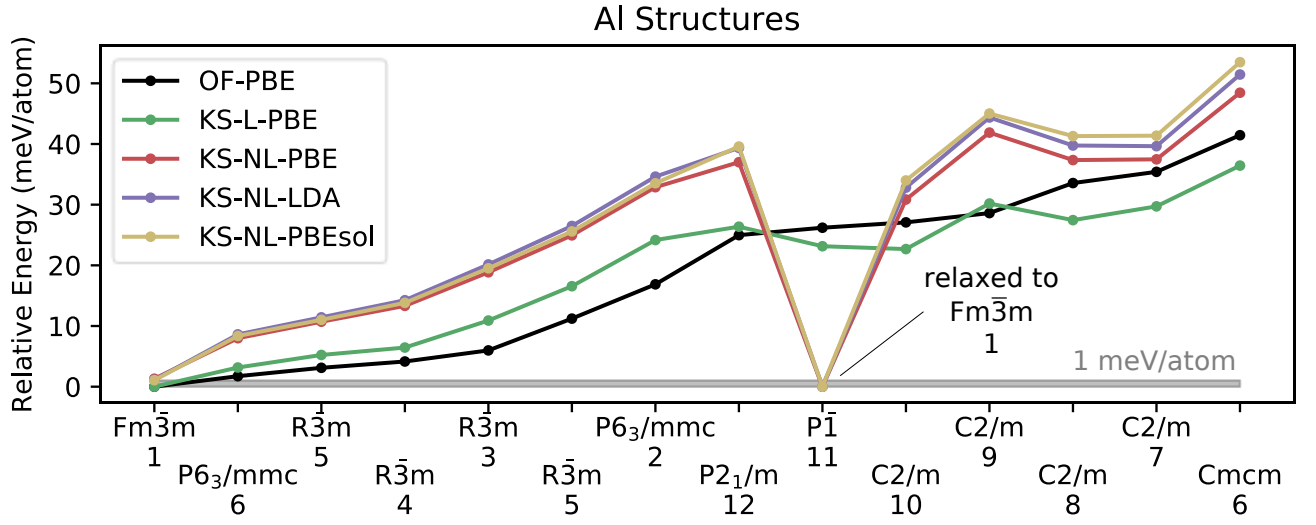

Figure S5: Relative energies of a subset of Al structures computed with OFDFT (OF) and KSDFT with local or nonlocal pseudopotentials (KS-L and KS-NL, respectively). The labels also include the exchange-correlation functional used for the final geometry optimization (LDA, PBE, or PBEsol). Compare with Fig. 5 (*top*) in the main paper.
